# Supplementary material for: An acceptance-based, intersectional stigma coping intervention for people with HIV who inject drugs—a randomized clinical trial
Source: PubMed Central journal article supplement — Lancet Reg Health Eur. 2023 Mar 20;28:100611. doi: 10.1016/j.lanepe.2023.100611 (PMC10173263; doi:10.1016/j.lanepe.2023.100611), 2023-03-20
Supplement: mmc4.pdf [file mmc4.pdf]

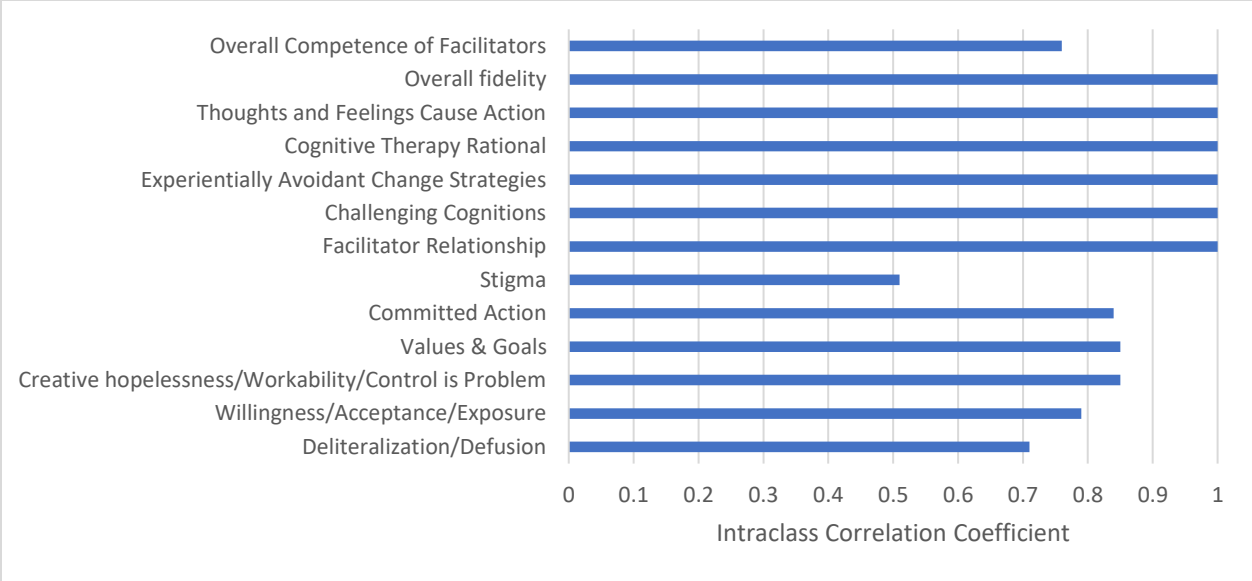

**Appendix Figure 1.** Interrater reliability based on the assessment of 11 segments rated by two assessors independently.
