# Supplementary figures and images for: An acceptance-based, intersectional stigma coping intervention for people with HIV who inject drugs—a randomized clinical trial
Source: PubMed Central journal article supplement — Lancet Reg Health Eur. 2023 Mar 20;28:100611. doi: 10.1016/j.lanepe.2023.100611 (PMC10173263; doi:10.1016/j.lanepe.2023.100611), 2023-03-20

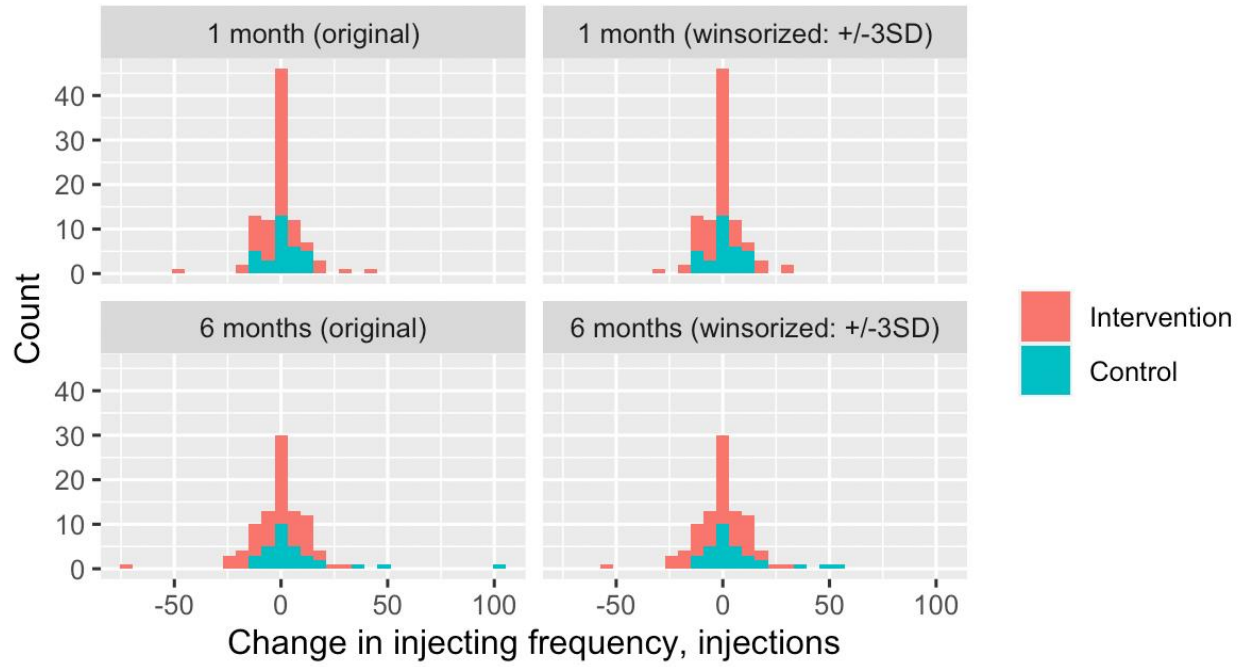

**Appendix Figure 2.** Change in injecting drug use frequency from baseline

Supplement: mmc5.pdf [file mmc5.pdf]

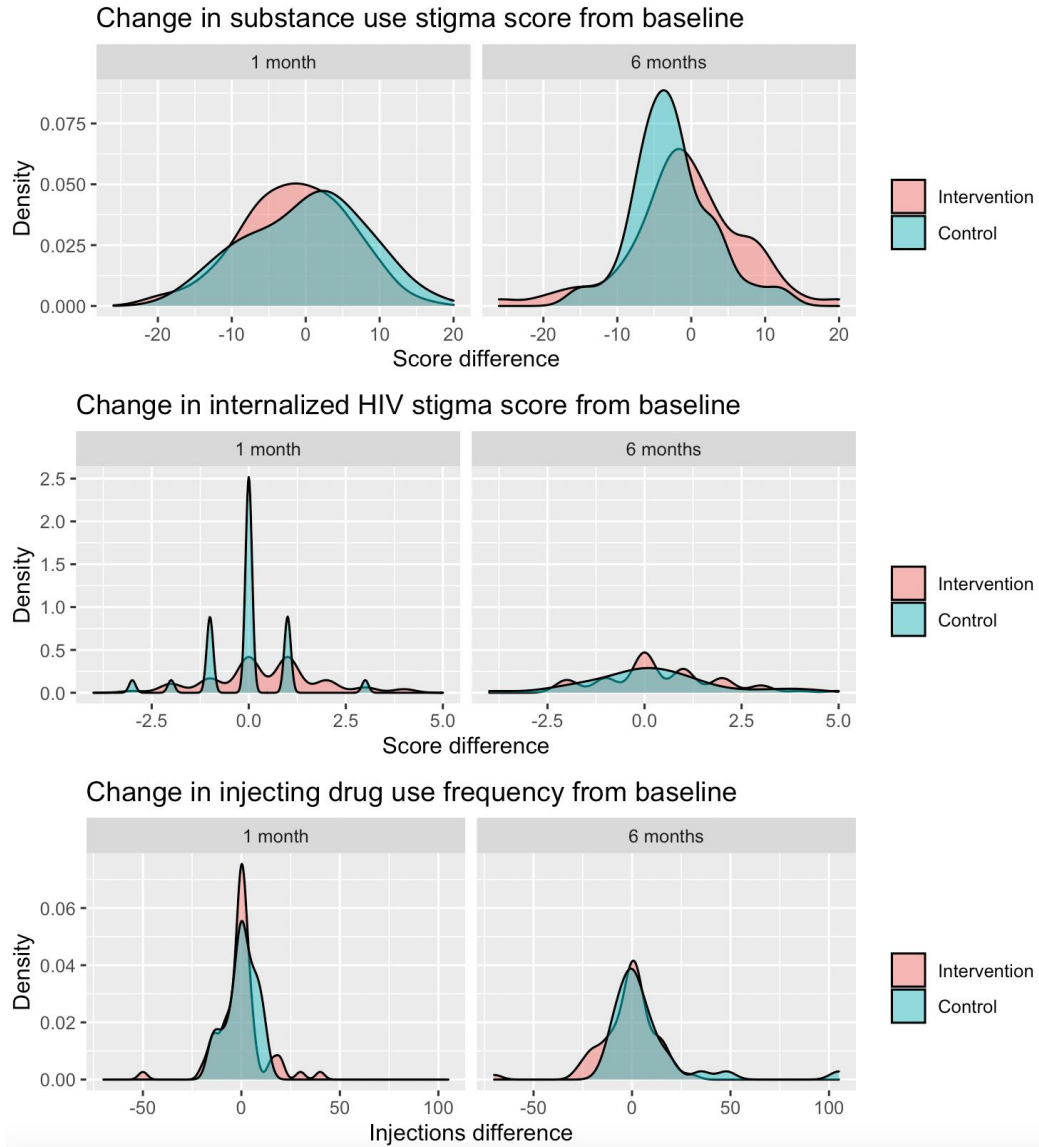

**Appendix Figure 3.** Distribution of continuous outcomes at 1 and 6 months

Supplement: mmc6.pdf [file mmc6.pdf]

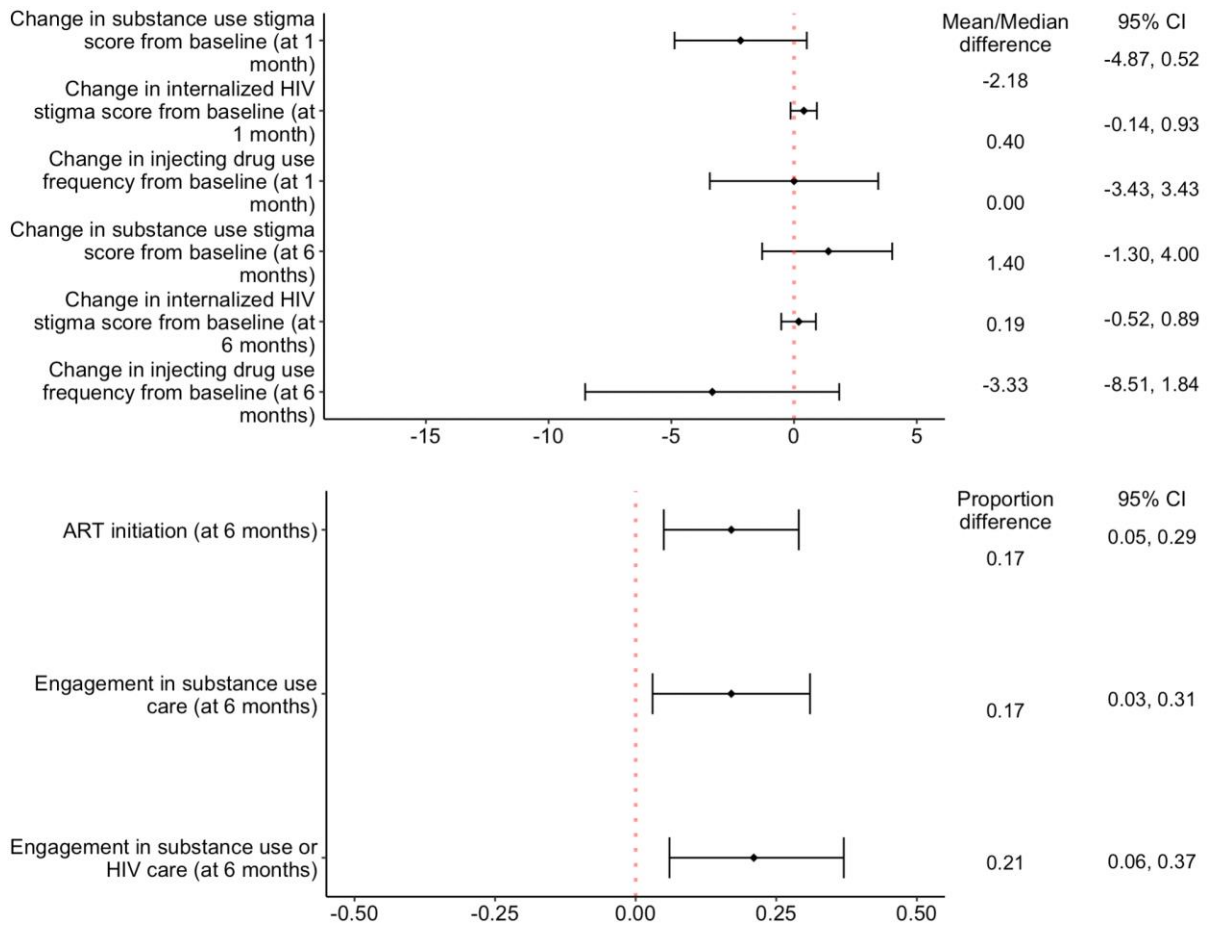

**Appendix Figure 4.** Forrest plots of primary and secondary outcomes.

Supplement: mmc7.pdf [file mmc7.pdf]
